# Supplementary material for: Polyvinylpyrrolidone-passivated fluorescent iron oxide quantum dots for turn-off detection of tetracycline in biological fluids
Source: PubMed Central journal article supplement — J Food Drug Anal. 2023 Mar 15;31(1):177–93. doi: 10.38212/2224-6614.3440 (PMC10208663; doi:10.38212/2224-6614.3440), 2023-03-15
Supplement: JFDA-31-01-177-s001.pdf [file JFDA-31-01-177-s001.pdf]

- The fluorescent iron oxide quantum dots were prepared using polyvinylpyrrolidone as passivant.
- The fluorescence of iron oxide quantum dots is quenched in the presence of tetracycline due to the static quenching, dynamic quenching as well as Förster resonance energy transfer and inner filter combination effects.
- Selective detection of tetracycline in urine samples in 5 minutes is achieved.
